# Supplementary material for: A genome-wide long noncoding RNA CRISPRi screen identifies PRANCR as a novel regulator of epidermal homeostasis
Source: PubMed Central journal article supplement — Genome Res. 2020 Jan;30(1):22–34. doi: 10.1101/gr.251561.119 (PMC6961571; doi:10.1101/gr.251561.119), 2020-01
Supplement: supp_gr.251561.119_Supplemental_Methods_R2.pdf [file supp_gr.251561.119_Supplemental_Methods_R2.pdf]

## Supplemental Methods

### RNA isolation and RT-qPCR

RNA was prepared by collecting cells or tissue in TRIzol reagent reagent and isolated using a Direct-zol RNA kit (Zymo research) using manufacturer's recommendations. For qRT-PCR experiments, RNA was reverse transcribed using iScript cDNA synthesis Kit (Bio-Rad), and iTaq Universal SYBR Green Supermix (Bio-Rad) was used. Reactions were carried out on a CFX96 Touch Real-Time PCR Detection System (Bio-Rad). Primers used were designed using Primer3 and sequences were as follows:

| Primer name | Sequence 5' to 3'          |
|-------------|----------------------------|
| PRANCR-Fwd  | GAGCTTGTGCGCGTACTTC        |
| PRANCR-Rev  | TGGTTTCATCAGAGGGGAAC       |
| CNOT2-Fwd   | TGGGTTTCTACTTCCGCAGG       |
| CNOT2-Rev   | CACAGTACCGGAGGCAATCA       |
| KRT1-Fwd    | GAAGTCTCGAGAAAGGGAGCA      |
| KRT1-Rev    | ATGGGTTCTAGTGGAGGTATCTA    |
| KRT10-Fwd   | GCAAATTGAGAGCCTGACTG       |
| KRT10-Rev   | CAGTGGACACATTTTCAAGG       |
| FLG-Fwd     | AAAGAGCTGAAGGAAGTTCTGG     |
| FLG-Rev     | AACCATATCTGGGTCATCTGG      |
| IVL-Fwd     | TGCCTGAGCAAGAATGTGAG       |
| IVL-Rev     | TGCTCTGGGTTTTCTGCTTT       |
| NEAT1-Fwd   | GACGGAGGTTGAGATGAAGC       |
| NEAT1-Rev   | ATTCGGGGCTCTGTAGTCCT       |
| MALAT1-Fwd  | TCGGGTATGCTGTTGTGAAA       |
| MALAT1-Rev  | TGACGTAACAGAATTAGTTCTTACCA |
| ACTB-Fwd    | AGGCACCAGGGCGTGAT          |
| ACTB-Rev    | GCCCACATAGGAATCCTTCTGAC    |
| GAPDH-Fwd   | TCGACAGTCAGCCGCATCT        |
| GAPDH-Rev   | AGTTAAAAGCAGCCCTGGTGA      |
| L32-Fwd     | AGGCATTGACAACAGGGTTC       |
| L32-Rev     | GTTGCACATCAGCAGCACTT       |

### Short hairpin design and selection

For knockdown of *PRANCR*, six independent short hairpin RNAs (shRNA) were initially designed and produced as described in the Methods section. The shRNA sequences are:

*PRANCR*-shA: 5'-TTCCACCCAAGCCACAATAAT-3' (selected as shLNC3)

*PRANCR*-shB: 5'-ACGACACGACCGTGCTTTAAA-3'

*PRANCR-shC*: 5'-GCAGATACTTCACTCCTTTAA-3'

*PRANCR-shD*: 5'-CCAGCTGGTCACTCTTGTTTA-3'

*PRANCR-shE*: 5'-CACTTTGAATGACAACGATTT-3' (selected as shLNC1)

*PRANCR-shF*: 5'- TACTTCACTCCTTTAAGTTTC -3' (selected as shLNC2)

*SCR1*: 5'-CCTAAGGTTAAGTCGCCCTCG-3'

*SCR2*: 5'-GCAAGCTGACCCTGAAGTTCA-3'

### **Immunofluorescence staining**

Slides with tissue were fixed 10 minutes using either 4% paraformaldehyde (PFA), ice-cold methanol or ice-cold acetone (see table below), then permeabilized in 0.1% PBS-Tween for 3 minutes. Blocking was performed in 0.1% PBS-T supplemented with 5% goat serum for 1 hour at room temperature. Primary antibodies (see below) were incubated in 0.1% PBS-T supplemented with 2% goat serum overnight at 4°C. Secondary antibodies were incubated in 0.1% PBS-T supplemented with 2% goat serum for 45 minutes at room temperature. Afterwards, slides were incubated with Hoechst stain for 2 minutes. Immunofluorescence was performed using the following antibodies, fixatives and dilutions:

| <b>Target (host)</b>                    | <b>Company (Catalog #)</b>     | <b>Fixative used</b> | <b>Dilution used</b> |
|-----------------------------------------|--------------------------------|----------------------|----------------------|
| <b>KRT10 (Rabbit)</b>                   | Abcam (76318)                  | 4% PFA               | 1:500                |
| <b>FLG (Rabbit)</b>                     | Santa Cruz (66192)             | Methanol             | 1:500                |
| <b>MKI67 (Mouse)</b>                    | Invitrogen (MA5-14520)         | Acetone              | 1:100                |
| <b>IRDye 680CW anti-Rabbit (Goat)</b>   | Li-Cor Biosciences (925-68071) | No                   | 1:10,000             |
| <b>IRDye 680CW anti- Mouse (Donkey)</b> | Li-Cor Biosciences (926-68072) | No                   | 1:10,000             |

### **Apoptosis analysis**

Apoptosis was analyzed using the Annexin V FITC Assay Kit (Cayman Chemical), according to manufacturer's instructions. In short,  $1 \times 10^5$  cells puromycin-selected cells were collected in V-shaped wells of a 96-well plate. After staining for Annexin V-FITC/Propidium Iodide, cells were quantified by flow cytometry using the Guava EasyCyte 8HT (Millipore). Apoptotic cells were defined as cells positive for Annexin V-FITC.

## Western blot

Protein lysates were loaded onto 4-12% Bis-Tris gels (Invitrogen) and resolved by electrophoresis. Wet transfer was performed onto PVDF membranes, and primary antibodies were incubated overnight at 4°C (dilutions shown below). Membranes were washed 3 times in PBS-0.1% Tween, then incubated with fluorescent secondary antibodies according to manufacturer's recommendations (Li-Cor), washed, and visualized. Blots were imaged and quantitated on an Odyssey imager (Li-Cor). Western blot was performed using the following antibodies:

| <b>Target (host)</b>                   | <b>Company (Catalog #)</b>                     | <b>Dilution used</b> |
|----------------------------------------|------------------------------------------------|----------------------|
| <b>CNOT2 (Rabbit)</b>                  | Cell Signaling Technologies (34214S)           | 1:1,000              |
| <b>TP53 (Mouse)</b>                    | Cell Signaling Technologies (18032S)           | 1:1,000              |
| <b>CDKN1A (p21; Rabbit)</b>            | Cell Signaling Technologies (2947T)            | 1:1,000              |
| <b>E2F4 (Rabbit)</b>                   | Cell Signaling Technologies (40291S)           | 1:1,000              |
| <b>TUBB (Mouse)</b>                    | Development Studies Hybridoma Bank (DSHB) (E7) | 1:1,000              |
| <b>GAPDH (Mouse)</b>                   | Santa Cruz (47724)                             | 1:200                |
| <b>LMNA/C (Mouse)</b>                  | Cell Signaling Technologies (4777S)            | 1:1,000              |
| <b>IRDye 680RD anti-mouse (Donkey)</b> | LI-COR Biosciences (926-68072)                 | 1:10,000             |
| <b>IRDye 800CW anti-rabbit (Goat)</b>  | LI-COR Biosciences (926-32211)                 | 1:10,000             |
